# Supplementary material for: Bridging the Gap between Economic Modelling and Simulation: A Simple Dynamic Aggregate Demand-Aggregate Supply Model with Matlab
Source: Hindawi journal article supplement (doi:10.1155/2018/3193068), 2018-01-01
Supplement: f1 [file 3193068.f1.zip]

Archive with 2 entries (2 files):
- 3193068.f1.pdf
- ADASdynamic.m
