# Supplementary material for: Bridging the Gap between Economic Modelling and Simulation: A Simple Dynamic Aggregate Demand-Aggregate Supply Model with Matlab
Source: Hindawi journal article supplement (doi:10.1155/2018/3193068), 2018-01-01
Supplement: f1 [file 3193068.f1.zip › ADASdynamic.m]

%% Dynamic AD-AS model
% Author: Jos� M. Gaspar,
% Cat�lica Porto Business School, Universidade Cat�lica Portuguesa
% Email: jgaspar@porto.ucp.pt

function ADASdynamic
clc; clear; close all;      
global c0 i0 G b k d  h tau alpha beta mdot yn a0 a1 a2
disp('------------------------');
disp('Dynamic AS-AD model'),
disp('------------------------');

options.Resize='on';
options.WindowStyle='normal';
options.Interpreter='tex';

%% Defining variables and parameters.

prompt = {'Autonomous consumption c_0=','Autonomous investment i_0=',...
    'Government spending G=','Propensity to consume b=',...
    'Real money balances demand sens. to real output k=',...
    'Real money balances demand sens. to nominal interest rate d=',...
    'Investment sens. to real interest rate h=','Tax rate \tau='};
name = 'AS-AD model exogenous variables and parameters (1)';
numlines = 1;
defaultanswer = {'10','5','5','0.8','0.05',...
    '0.05','0.1','0.3'};    %Default values
answer1 = inputdlg(prompt,name,numlines,defaultanswer,options);       

if isempty(answer1)     %Leave program.
    clc;
    return
end

c0=str2double(answer1{1});      
i0=str2double(answer1{2});      
G=str2double(answer1{3});       
b=str2double(answer1{4});       
k=str2double(answer1{5});       
d=str2double(answer1{6});      
h=str2double(answer1{7});       
tau=str2double(answer1{8});       


prompt={'Parameter dy/dt=\alpha(A+a_1*y(t)-hr(t)  \alpha=',...
    'Parameter dr/dt=\beta(-M/P+L+ky(t)-ur(t))  \beta=',...
    'Money supply growth rate dm/dt=',...
    'Natural output (in logs) y_n='};
name='AS-AD model exogenous variables and parameters';
numlines=1;
defaultanswer={'0.1','1','0.01','1'};       
answer2=inputdlg(prompt,name,numlines,defaultanswer,options);       % ""

if isempty(answer2)     %""
    clc;
    return
end

alpha=str2double(answer2{1});       
beta=str2double(answer2{2});        
mdot=str2double(answer2{3});        
yn=str2double(answer2{4});          

%Output must be non-negative
if yn<0
    errordlg('Equilibrium output is negative','Error');
end

%Initial conditions
prompt={'Real output initial value  y(0)=',...
    'Expected inflation initial value  \pi^e(0)=',...
    'initial time  t_0=','final time  t_f='};
name='Initial conditions';
numlines=1;
defaultanswer={'0.05','0.15','0','100'};        %Default values
answer3=inputdlg(prompt,name,numlines,defaultanswer,options);       % ""

if isempty(answer3)     % ""
    clc;
    return
end

y0=str2double(answer3{1});         
pie0=str2double(answer3{2});         
t0=str2double(answer3{3});         
tf=str2double(answer3{4});          

a0=(c0+i0+G)./(1-b.*(1-tau)+((h.*k)./d));       %
a1=(h./d)/(1-b.*(1-tau)+((h.*k)./d));              %
a2=h/(1-b.*(1-tau)+((h.*k)./d));
%%%

%% Used parameters and values
 % Display chosen values
fprintf(['\nAS-AD dynamic model:\n                    '...
    'dy/dt=a1*dm/dt-alpha(a1-a2*beta)*(y-yn)-a1*pie\n         '...
    'dpie/dt=beta*alpha(y-yn)\n']);
fprintf(['\nAS and AD curves:\n                    '...
    '(AD)y=dm/dt-alpha(a1-a2*beta*pie                   '...
    '(Long run AS) y=yn ']);
fprintf(['\ny: Real output\npie: Expected inflation\na0='...
    '(c0+i0+G)/(1-b*(1-tau)+((h*k)/d) = %g\n'...
    'a1:(h/d)/(1-b*(1-tau)+((h*k)/d)) =  %g\n'...
    'a2: h/(1-b*(1-tau)+((h*k)/d)) = %g\n'],...
    a0,a1,a2);
fprintf(['\nParameter values:\nc0 = %g; i0 =  %g; G = %g;'...
    'b = %g; k = %g; d = %g; h = %g; tau = %g;\n'],...
    c0,i0,G,b,k,d,h,tau);
fprintf('alpha = %g; beta = %g; mdot = %g; yn = %g\n',...
    alpha,beta,mdot,yn);
fprintf(['\nInitial conditions:\ny0 = %g; pie0 =  %g\n----------'...
    '--------------------------------------------------\n'],...
    y0,pie0);
%%%

%% IVP: Initial value problem
% solving the differential equations numerically
[t,ydot]=ode45(@dynamicasad,[t0 tf],[y0 pie0]);      

if all(ydot(1,:) > 0) %If values for real output are nonnegative, continue.
else
    ButtonName = questdlg(['Chosen parameter values imply negative'...
        'real output. Continue?'], ...
                         'Caution!','Yes', 'No','No');
                     fprintf(['\n!!!Real output cannot'...
                         'be negative at any t:\nDisplaying'...
                         'simulation as illustration. \n\n'])
                     if strcmp(ButtonName,'N�o')==1 % Cancels program
                         fprintf(['\nSimulation cancelled: Real'...
                             'output cannot be negative at any t\n\n']);
                             return
                    end
end
%%%

%% Steady-state equilibrium.
options=optimset('Display','off');      
% solving for the steady state of y and pie
[pe]=fsolve(@(y) dynamicasad(t,y),[y0;pie0],options);
pieq=mdot;
disp(' ');
disp('Steady-State:');
fprintf(['\nSteady-state real ouput  '...
    'Steady state expected inflation\n'...
    '%f                 %f\n'],pe(1,1),pe(2,1));
disp('Steady state actual inflation');
disp(pieq);

%%%

%% Stability of equilibria
% Jacobian matrix of @dynamicasad
j = zeros(2,2);
j(1,1) = -alpha.*(a1-a2.*beta);
j(1,2) = -a1;
j(2,1) = alpha*beta;
j(2,2) = 0;       
disp('Eigenvalues');
disp(eig(j));        

if 1/d>beta % this is equivalent to real(eig(J))<0 
    if isreal(eig(j))==0  
    disp('Stable spiral.');
    else
        disp('Stable node.')
    end
elseif 1/d<beta % this is equivalent to real(eig(J))>0
    if isreal(eig(j))==0
    disp('Unstable spiral.')
    elseif isreal(eig(j))==1
    disp('Unstable node.')
    end
else    % this is equivalent to real(eig(J))==0
    disp('Stable center with periodic solutions'); 
                % No saddle points because det(j)>0!
end
%%%

%% Numerical solution to the IVP

% solving the differential equations numerically
[t,ydot]=ode45(@dynamicasad,[t0 tf],[y0 pie0]);       

% Plot solution for output
figure(1);
plot(t,ydot(:,1),'LineWidth',1.5);
set(gca,'FontName','Times','FontSize',16);
title('Output');
xl=xlabel('time','Interpreter','latex');
yl=ylabel('y','Interpreter','latex');
set(xl,'FontSize',18);
set(yl,'FontSize',18);
leg=legend('y');
set(leg,'Interpreter','latex');

% Plot solutions for actual and expected inflation
pi=alpha.*((ydot(:,1)-yn)./yn)+ydot(:,2); % Actual inflation
figure(2);
plot(t,[ydot(:,2) pi],'LineWidth',1.5); % actual and expected inflation
set(gca,'FontName','Times','FontSize',16);
title('Actual inflation and expected inflation');
xl=xlabel('time','Interpreter','latex');
yl=ylabel('$\pi, \pi^e$','Interpreter','latex');
set(xl,'FontSize',18);
set(yl,'FontSize',18);
leg=legend('$\pi^e$',' $\pi$');
set(leg,'Interpreter','latex');
%%%


%% Phase diagram with vector field

figure(3)
plot(ydot(:,1),ydot(:,2),'LineWidth',1.5);   % plot solutions    
hold on;
% the following commands are for purposes of graphical representation
if min(ydot(:,1))<0     
    yval=linspace(min(ydot(:,1))/1.05,max(ydot(:,1))*1.05,20);
    % using any normalization may be better than 1.05 though...
else
    yval=linspace(min(ydot(:,1))/1.05,max(ydot(:,1))*1.05,20);
end

if min(ydot(:,2))<0     % "  "
    pieval=linspace(min(ydot(:,2))/1.05,max(ydot(:,2))*1.05,20);
else
    pieval=linspace(min(ydot(:,2))/1.05,max(ydot(:,2))*1.05,20);
end
if y0 ~= yn || pie0 ~= mdot     % no phase diagram if starting at ss.
campovectorial(@dynamicasad,yval,pieval);    % Vector fields: See end.
else
end

% Demand pressure curve: dy/dt=0 locus
y=a1.*(mdot-pieval)./(alpha.*(a1-a2*beta))+yn;
plot(y, pieval,'k','LineWidth',1.5);

% Long-run Phillips curve: dpie/dt=0 locus
line([yn yn],[min(pieval) max(pieval)], [1 1],'Color','g','LineWidth',1.5);
set(gca,'FontName','Times','FontSize',16);
title('Phase diagram');
xl = xlabel('y','Interpreter','latex');
yl = ylabel('$\pi^e$','Interpreter','latex');
set(xl,'FontSize',18);
set(yl,'FontSize',18);
leg=legend('Solution','Vector field','$\dot{y}=0$',...
    '$\dot{\pi^e}=0$ (LR PC)');
set(leg,'Interpreter','latex');
axis([min(yval) max(yval) min(pieval) max(pieval)])
hold off;
%%%

%% Add variables to workspace
assignin('base','tbeforeshock',t);     
assignin('base','Ybeforeshock',ydot(:,1));
assignin('base','Piebeforeshock',ydot(:,2));
%%%

%% Modeling shocks
% Apply shocks to the model?
ButtonName3 = questdlg('Apply shocks to the AS-AD model?', ...
                         'Shocks to the AS-AD model','Yes', 'No','No');
if strcmp(ButtonName3,'No')==1     % End program
   return
end
y0=ydot(:,1);   % New initial condition for y (1)
pie0=ydot(:,2); % New initial condition for pie (1)
pieinit=pie0(length(pie0)); % New initial condition for pie (1)
yn0=yn; % Define old Long-run Phillips curve: dpie/dt=0 locus

% Monetary policy shocks through money supply growth
options.Resize='on';
options.WindowStyle='normal';
options.Interpreter='tex';
prompt = {'Define new money supply growth rate, dm/dt'};
name = 'Monetary policy shocks (default value means no shock)';
numlines = 1;
defaultanswer = {num2str(mdot)};     % Default values
answer4 = inputdlg(prompt,name,numlines,defaultanswer,options);       
if isempty(answer4)    
    mdot=str2double(answer2{3});
else
    mdot=str2double(answer4{1}); 
end

% Fiscal policy shocks through taxes and public spending
options.Resize='on';
options.WindowStyle='normal';
options.Interpreter='tex';
prompt = {'Define new public spending (permanent change),  G=',...
    'Define new tax rate (permanent change) , \tau='};
name = 'Fiscal policy shocks (default values means no shocks)';
numlines = 1;
defaultanswer = {num2str(G),num2str(tau)};     %Default values
answer5 = inputdlg(prompt,name,numlines,defaultanswer,options); 
mdotp=(y0-a0)./a1-(a2/a1).*pie0;    %This comes from the static AD curve; 
% mdotp=m-p is the residual from the AD static curve that will be used
% to compute the new initial value of y after a fiscal policy shock.
if isempty(answer5)    
    G=str2double(answer1{3});
    tau=str2double(answer1{8});
    yinit=y0(length(y0));   % New initial conditions for y (2)
else
    % redefine variables
   G=str2double(answer5{1});
   tau=str2double(answer5{2});
   a0=(c0+i0+G)./(1-b.*(1-tau)+((h.*k)./d));       %
   a1=(h./d)/(1-b.*(1-tau)+((h.*k)./d));              %
   a2=h/(1-b.*(1-tau)+((h.*k)./d));
   % Set new initial condition for y after fiscal policy shock
   yinit=a0+a1.*mdotp(length(mdotp))+...
       a2.*pieinit;  % New initial conditions for y (2)
   
end

% Technology shocks through natural output
options.Resize='on';
options.WindowStyle='normal';
options.Interpreter='tex';
prompt = {'Define new natural output level, y_n='};
name = 'Technology shocks (default value means no shock)';
numlines = 1;
defaultanswer = {num2str(yn)};     % Default values
answer6 = inputdlg(prompt,name,numlines,defaultanswer,options);       
if isempty(answer6)    
    yn=str2double(answer2{4});
else
    yn=str2double(answer6{1});
end
if isempty(answer4) && isempty(answer5) && isempty(answer6)
    return %no shocks -> end program
end

% Solving the differential equations numerically
[t,ydot2]=ode45(@dynamicasad,[t0 tf],[yinit pieinit]); 

% Output
figure(4);
plot(t,ydot2(:,1),'LineWidth',1.5); % Output
set(gca,'FontName','Times','FontSize',16);
title('Output');
xl = xlabel('time','Interpreter','latex');
yl = ylabel('y','Interpreter','latex');
set(xl,'FontSize',18);
set(yl,'FontSize',18);
leg=legend('y');
set(leg,'Interpreter','latex');
if yinit <= yn+0.0001 && yinit >= yn-0.00001 && pieinit <= mdot+0.0001...
        && pieinit >= mdot-0.0001   % initial value depends on numerical
    %solution of ode45
    axis([min(t) max(t) 0 max(ydot(:,1))+1]);
else
end

% Actual and expected inflation
pi2=alpha.*((ydot2(:,1)-yn)./yn)+ydot2(:,2); % Actual inflation
figure(5);
plot(t,[ydot2(:,2) pi2],'LineWidth',1.5);   %actual and expected inflation
set(gca,'FontName','Times','FontSize',16);
title('Actual inflation and expected inflation');
xl = xlabel('time','Interpreter','latex');
yl = ylabel('$\pi, \pi^e$','Interpreter','latex');
set(xl,'FontSize',18);
set(yl,'FontSize',18);
leg=legend('$\pi^e$',' $\pi$');
set(leg,'Interpreter','latex');
if yinit <= yn+0.0001 && yinit >= yn-0.0001 && pieinit <= mdot+0.0001...
        && pieinit >= mdot-0.0001   % initial value depends on numerical
    %solution of ode45
    axis([min(t) max(t) min(ydot(:,2)) max(ydot(:,2))+0.1]);
else
end

% Phase diagram
figure(6)

% the following commands are for purposes of graphical representation
if min(ydot2(:,1))<0     
    yval2=linspace(min(ydot2(:,1))*1.05,max(ydot2(:,1))*1.05,20);
else
    yval2=linspace(min(ydot2(:,1))/1.05,max(ydot2(:,1))*1.05,20);
end

if min(ydot2(:,2))<0     % "  "
    pieval2=linspace(min(ydot2(:,2))*1.05,max(ydot2(:,2))*1.05,20);
else
    pieval2=linspace(min(ydot2(:,2))/1.05,max(ydot2(:,2))*1.05,20);
end
if yinit >= yn+0.0001 || yinit <= yn-0.0001 || pieinit >= mdot+0.001...
        || pieinit <= mdot-0.0001   % initial value depends on numerical
    %solution of ode45
plot(ydot2(:,1),ydot2(:,2),'LineWidth',1.5);      
hold on;
campovectorial(@dynamicasad,yval2,pieval2);    % Vector fields - See end.
else
end

% Demand pressure curve: dy/dt=0 locus
y1=a1.*(mdot-pieval2)./(alpha.*(a1-a2*beta))+yn; %dy/dt=0 locus after shock
plot(y, pieval,'k','LineWidth',1.5);    % old dy/dt locus
plot(y1, pieval2,'m','LineWidth',1.5);  % new dy/dt


% Long-run Phillips curve: dpie/dt=0 locus
line([yn yn],[min(pieval2) max(pieval2)], [1 1],'Color','g',...
    'LineWidth',1.5);   %new L-R PC
line([yn0 yn0],[min(pieval2) max(pieval2)], [1 1],'Color','c',...
    'LineWidth',1.5);   %old L-R PC
set(gca,'FontName','Times','FontSize',16);
title('Phase diagram');
xl =xlabel('y','Interpreter','latex');
yl = ylabel('$\pi^e$','Interpreter','latex');
set(xl,'FontSize',18);
set(yl,'FontSize',18);
leg=legend('Solution','Vector field','$\dot{y}=0$ (1)',...
    '$\dot{y}=0$ (2)','$\dot{\pi^e}=0$ (LR PC) (1)',...
    '$\dot{\pi^e}=0$ (LR PC) (2)');
set(leg,'Interpreter','latex');
axis([min(yval2) max(yval2) min(pieval2) max(pieval2)])
hold off;

% Display parameter values after shocks
disp('----------------------------');
disp('Policy and Technology shocks'),
disp('----------------------------');
fprintf('\na0 = %g\na1 =  %g\na2 = %g\n',...
    a0,a1,a2);
fprintf(['\nNew parameter values:\nc0 = %g; i_0 =  %g;'...
    'G = %g; b = %g; k = %g;'...
    'd = %g; h = %g; tau = %g;\n'],...
    c0,i0,G,b,k,d,h,tau);
fprintf('alpha = %g; beta = %g; mdot = %g; yn = %g',...
    alpha,beta,mdot,yn); 
fprintf(['\nNew initial conditions:\ny0 = %g; pie0 =  %g\n----------'...
    '--------------------------------------------------\n'],...
    yinit,pieinit); 

%New steady-state values
options=optimset('Display','off');      
[pe1]=fsolve(@(y) dynamicasad(t,y),[y0(length(y0));...
    pie0(length(pie0))],options);    %solve for the ss values of y and pie
pieq=mdot;
disp(' ');
disp('New Steady-State:');
fprintf(['\nSteady-state real ouput    Steady state expected'...
    'inflation\n      %f                 %f\n'],pe1(1,1),pe1(2,1));
disp('Steady state actual inflation');
disp(pieq);

%%Add variables to workspace
assignin('base','taftershock',t);     %time vector
assignin('base','Yaftershock',ydot2(:,1));  %output vector after shock
assignin('base','Pieaftershock',ydot2(:,2));    % exp. inflation a/s.

%% Functions

%Differential equations for the AS-AD model
function [ ydot ] = dynamicasad( ~,y )   
global alpha beta yn mdot  a1 a2

ydot=zeros(2,1);        
ydot(1)=a1.*mdot-alpha.*(a1-a2.*beta).*...
    (y(1)-yn)-a1.*y(2);       %Aggregate demand dynamics
ydot(2)=beta.*alpha.*(y(1)-yn);    %Aggregate supply dynamics

%Vector field
function campovectorial(func,y1val,r1val)

n1=length(y1val);
n2=length(r1val);
%yp1 e yp2 are the vectors associated with yval and rval, respectivelly.
yp1=zeros(n2,n1);       % y1val e y2val have to be equally spaced
yp2=zeros(n2,n1);
for i=1:n1
  for j=1:n2
    ypv = feval(func,0,[y1val(i);r1val(j)]);  %yp1 e yp2 are the
    %vectors associated with y1val and r1val.
    yp1(j,i) = ypv(1);
    yp2(j,i) = ypv(2);
  end
end
quiver(y1val,r1val,yp1,yp2,'r','LineWidth',1.4);   %Draw arrows on the
%velocity vectors
axis tight;
